# Supplementary material
Source: publisher figshare collection journal article supplement (https://acs.figshare.com/ndownloader/files/4336471)
Supplement: Supplementary file 1 [file 4336471]

 
data_jj026m 
  
_audit_creation_method           SHELXL-97 
_chemical_name_systematic        ? 
_chemical_name_common            ? 
_chemical_formula_moiety         'C25 H22 N2 O3' 
_chemical_formula_sum            'C25 H22 N2 O3' 
_chemical_melting_point          ? 
  
_exptl_crystal_description       parallelepiped 
_exptl_crystal_colour            green 
  
_diffrn_ambient_temperature      297(2) 
_chemical_formula_weight         398.45 
  
loop_ 
_atom_type_symbol 
_atom_type_description 
_atom_type_scat_dispersion_real 
_atom_type_scat_dispersion_imag 
_atom_type_scat_source 
C C 0.0033 0.0016 'International Tables Vol C Tables 4.2.6.8 and 6.1.1.4' 
H H 0.0000 0.0000 'International Tables Vol C Tables 4.2.6.8 and 6.1.1.4' 
N N 0.0061 0.0033 'International Tables Vol C Tables 4.2.6.8 and 6.1.1.4' 
O O 0.0106 0.0060 'International Tables Vol C Tables 4.2.6.8 and 6.1.1.4' 
  
_symmetry_cell_setting           monoclinic 
_symmetry_space_group_name_H-M   'P 21/c' 
_symmetry_int_tables_number      14 
_chemical_absolute_configuration ? 
  
loop_ 
_symmetry_equiv_pos_as_xyz 
'x, y, z' 
'-x, y+1/2, -z+1/2' 
'-x, -y, -z' 
'x, -y-1/2, z-1/2' 
  
_cell_length_a                   11.5671(11) 
_cell_length_b                   8.6420(8) 
_cell_length_c                   21.537(2) 
_cell_angle_alpha                90.00 
_cell_angle_beta                 101.217(2) 
_cell_angle_gamma                90.00 
_cell_volume                     2111.8(3) 
_cell_formula_units_Z            4 
_cell_measurement_temperature    297(2) 
_cell_measurement_reflns_used    3385 
_cell_measurement_theta_min      2.367 
_cell_measurement_theta_max      25.113 
_exptl_crystal_size_max          0.62 
_exptl_crystal_size_mid          0.38 
_exptl_crystal_size_min          0.25 
_exptl_crystal_density_meas      ? 
_exptl_crystal_density_diffrn    1.253 
_exptl_crystal_density_method    'not measured' 
_exptl_crystal_F_000             840 
_exptl_absorpt_coefficient_mu    0.083 
_exptl_absorpt_correction_type   empirical 
_exptl_absorpt_correction_T_min  0.773149 
_exptl_absorpt_correction_T_max  1.000000 
_exptl_absorpt_process_details   ? 
  
_exptl_special_details 
; 
 ? 
; 
_diffrn_radiation_probe          x-ray 
_diffrn_radiation_type           MoK\a 
_diffrn_radiation_wavelength     0.71073 
_diffrn_source                   'fine-focus sealed tube' 
_diffrn_radiation_monochromator  graphite 
_diffrn_measurement_device_type  'CCD area detector' 
_diffrn_measurement_method       'phi and omega scans' 
_diffrn_detector_area_resol_mean ? 
_diffrn_reflns_number            11577 
_diffrn_reflns_av_R_equivalents  0.0383 
_diffrn_reflns_av_sigmaI/netI    0.0378 
_diffrn_reflns_limit_h_min       -13 
_diffrn_reflns_limit_h_max       14 
_diffrn_reflns_limit_k_min       -10 
_diffrn_reflns_limit_k_max       9 
_diffrn_reflns_limit_l_min       -26 
_diffrn_reflns_limit_l_max       24 
_diffrn_reflns_theta_min         1.79 
_diffrn_reflns_theta_max         26.01 
_reflns_number_total             4132 
_reflns_number_gt                2569 
_reflns_threshold_expression     >2sigma(I) 
  
_computing_data_collection       'Bruker SMART' 
_computing_cell_refinement       'Bruker SMART' 
_computing_data_reduction        'Bruker SHELXTL' 
_computing_structure_solution    'SHELXS-97 (Sheldrick, 2008)' 
_computing_structure_refinement  'SHELXL-97 (Sheldrick, 2008)' 
_computing_molecular_graphics    'Bruker SHELXTL' 
_computing_publication_material  'Bruker SHELXTL' 
  
_refine_special_details 
; 
 Refinement of F^2^ against ALL reflections.  The weighted R-factor wR and 
 goodness of fit S are based on F^2^, conventional R-factors R are based 
 on F, with F set to zero for negative F^2^. The threshold expression of 
 F^2^ > 2sigma(F^2^) is used only for calculating R-factors(gt) etc. and is 
 not relevant to the choice of reflections for refinement.  R-factors based 
 on F^2^ are statistically about twice as large as those based on F, and R- 
 factors based on ALL data will be even larger. 
; 
  
_refine_ls_structure_factor_coef Fsqd 
_refine_ls_matrix_type           full 
_refine_ls_weighting_scheme      calc 
_refine_ls_weighting_details 
'calc w=1/[\s^2^(Fo^2^)+(0.1183P)^2^+0.7830P] where P=(Fo^2^+2Fc^2^)/3' 
_atom_sites_solution_primary     direct 
_atom_sites_solution_secondary   difmap 
_atom_sites_solution_hydrogens   geom 
_refine_ls_hydrogen_treatment    constr 
_refine_ls_extinction_method     none 
_refine_ls_extinction_coef       ? 
_refine_ls_number_reflns         4132 
_refine_ls_number_parameters     274 
_refine_ls_number_restraints     0 
_refine_ls_R_factor_all          0.0880 
_refine_ls_R_factor_gt           0.0611 
_refine_ls_wR_factor_ref         0.2151 
_refine_ls_wR_factor_gt          0.1944 
_refine_ls_goodness_of_fit_ref   0.998 
_refine_ls_restrained_S_all      0.998 
_refine_ls_shift/su_max          0.000 
_refine_ls_shift/su_mean         0.000 
  
loop_ 
_atom_site_label 
_atom_site_type_symbol 
_atom_site_fract_x 
_atom_site_fract_y 
_atom_site_fract_z 
_atom_site_U_iso_or_equiv 
_atom_site_adp_type 
_atom_site_occupancy 
_atom_site_symmetry_multiplicity 
_atom_site_calc_flag 
_atom_site_refinement_flags 
_atom_site_disorder_assembly 
_atom_site_disorder_group 
O1 O 0.86320(16) 0.2344(2) 0.02435(9) 0.0543(5) Uani 1 1 d . . . 
O2 O 0.83983(19) 0.3503(3) 0.11195(11) 0.0738(7) Uani 1 1 d . . . 
O3 O 1.26685(17) 0.4887(2) 0.25681(8) 0.0543(5) Uani 1 1 d . . . 
N1 N 0.8754(2) -0.0272(3) -0.16812(12) 0.0688(8) Uani 1 1 d . . . 
N2 N 1.3340(2) 0.7025(3) 0.20355(11) 0.0530(6) Uani 1 1 d . . . 
C1 C 0.9294(2) 0.2009(3) -0.02119(12) 0.0439(6) Uani 1 1 d . . . 
C2 C 0.8734(2) 0.1085(3) -0.06978(13) 0.0516(7) Uani 1 1 d . . . 
H2A H 0.7972 0.0737 -0.0700 0.062 Uiso 1 1 calc R . . 
C3 C 0.9303(2) 0.0665(3) -0.11906(13) 0.0507(7) Uani 1 1 d . . . 
C4 C 1.0448(3) 0.1262(3) -0.11707(13) 0.0547(7) Uani 1 1 d . . . 
H4A H 1.0845 0.1033 -0.1495 0.066 Uiso 1 1 calc R . . 
C5 C 1.0976(2) 0.2178(3) -0.06752(13) 0.0493(7) Uani 1 1 d . . . 
H5A H 1.1731 0.2550 -0.0674 0.059 Uiso 1 1 calc R . . 
C6 C 1.0433(2) 0.2576(3) -0.01743(12) 0.0420(6) Uani 1 1 d . . . 
C7 C 1.0953(2) 0.3516(3) 0.03738(11) 0.0393(6) Uani 1 1 d . . . 
C8 C 1.0266(2) 0.3823(3) 0.08298(12) 0.0424(6) Uani 1 1 d . . . 
C9 C 0.9054(2) 0.3253(3) 0.07564(12) 0.0486(7) Uani 1 1 d . . . 
C10 C 1.0723(2) 0.4681(3) 0.13673(12) 0.0460(6) Uani 1 1 d . . . 
H10A H 1.0247 0.4894 0.1659 0.055 Uiso 1 1 calc R . . 
C11 C 1.1872(2) 0.5228(3) 0.14789(12) 0.0442(6) Uani 1 1 d . . . 
C12 C 1.2589(2) 0.4917(3) 0.10287(12) 0.0419(6) Uani 1 1 d . . . 
C13 C 1.2107(2) 0.4096(3) 0.04822(12) 0.0432(6) Uani 1 1 d . . . 
H13A H 1.2566 0.3927 0.0179 0.052 Uiso 1 1 calc R . . 
C14 C 1.3813(2) 0.5469(3) 0.11689(13) 0.0468(6) Uani 1 1 d . . . 
C15 C 1.4651(2) 0.4975(3) 0.08311(14) 0.0543(7) Uani 1 1 d . . . 
H15A H 1.4422 0.4290 0.0497 0.065 Uiso 1 1 calc R . . 
C16 C 1.5813(3) 0.5461(4) 0.09710(15) 0.0628(8) Uani 1 1 d . . . 
H16A H 1.6354 0.5115 0.0734 0.075 Uiso 1 1 calc R . . 
C17 C 1.6148(3) 0.6466(4) 0.14680(16) 0.0658(9) Uani 1 1 d . . . 
H17A H 1.6925 0.6805 0.1566 0.079 Uiso 1 1 calc R . . 
C18 C 1.5363(3) 0.6976(4) 0.18211(15) 0.0602(8) Uani 1 1 d . . . 
H18A H 1.5617 0.7659 0.2153 0.072 Uiso 1 1 calc R . . 
C19 C 1.4169(2) 0.6490(3) 0.16925(13) 0.0513(7) Uani 1 1 d . . . 
C20 C 1.2362(2) 0.6046(3) 0.20764(12) 0.0480(7) Uani 1 1 d . . . 
H20A H 1.1737 0.6696 0.2186 0.058 Uiso 1 1 calc R . . 
C21 C 1.3047(3) 0.5597(4) 0.31740(14) 0.0635(8) Uani 1 1 d . . . 
H21A H 1.3270 0.4799 0.3492 0.076 Uiso 1 1 calc R . . 
H21B H 1.2399 0.6179 0.3284 0.076 Uiso 1 1 calc R . . 
C22 C 1.4078(3) 0.6663(4) 0.31753(14) 0.0649(8) Uani 1 1 d . . . 
H22A H 1.4759 0.6072 0.3111 0.078 Uiso 1 1 calc R . . 
H22B H 1.4279 0.7192 0.3579 0.078 Uiso 1 1 calc R . . 
C23 C 1.3738(3) 0.7839(4) 0.26428(14) 0.0662(9) Uani 1 1 d . . . 
H23A H 1.3110 0.8498 0.2731 0.079 Uiso 1 1 calc R . . 
H23B H 1.4411 0.8488 0.2616 0.079 Uiso 1 1 calc R . . 
C24 C 0.7606(3) -0.0917(4) -0.16655(16) 0.0675(9) Uani 1 1 d . . . 
H24A H 0.7354 -0.1551 -0.2033 0.116(15) Uiso 1 1 calc R . . 
H24B H 0.7051 -0.0094 -0.1662 0.16(2) Uiso 1 1 calc R . . 
H24C H 0.7652 -0.1536 -0.1291 0.125(16) Uiso 1 1 calc R . . 
C25 C 0.9317(3) -0.0717(5) -0.21872(17) 0.0855(11) Uani 1 1 d . . . 
H25A H 1.0064 -0.0202 -0.2142 0.128 Uiso 1 1 calc R . . 
H25B H 0.8829 -0.0433 -0.2584 0.128 Uiso 1 1 calc R . . 
H25C H 0.9438 -0.1817 -0.2176 0.128 Uiso 1 1 calc R . . 
  
loop_ 
_atom_site_aniso_label 
_atom_site_aniso_U_11 
_atom_site_aniso_U_22 
_atom_site_aniso_U_33 
_atom_site_aniso_U_23 
_atom_site_aniso_U_13 
_atom_site_aniso_U_12 
O1 0.0447(11) 0.0617(13) 0.0581(11) -0.0038(9) 0.0140(9) -0.0090(9) 
O2 0.0576(13) 0.0930(18) 0.0775(14) -0.0153(13) 0.0300(11) -0.0116(12) 
O3 0.0681(13) 0.0417(11) 0.0500(10) -0.0015(8) 0.0039(9) 0.0017(9) 
N1 0.0690(17) 0.0704(18) 0.0643(16) -0.0147(13) 0.0062(13) -0.0146(14) 
N2 0.0608(15) 0.0359(12) 0.0576(13) -0.0026(10) -0.0002(11) -0.0008(11) 
C1 0.0446(14) 0.0397(13) 0.0470(14) 0.0036(11) 0.0082(11) 0.0014(11) 
C2 0.0461(15) 0.0470(15) 0.0589(16) 0.0034(13) 0.0031(13) -0.0075(12) 
C3 0.0528(16) 0.0432(15) 0.0529(15) 0.0002(12) 0.0024(13) -0.0006(12) 
C4 0.0535(17) 0.0568(17) 0.0546(16) -0.0026(14) 0.0125(13) 0.0012(14) 
C5 0.0428(14) 0.0508(16) 0.0547(15) -0.0026(12) 0.0108(12) -0.0036(12) 
C6 0.0396(14) 0.0365(13) 0.0484(14) 0.0055(11) 0.0050(11) 0.0018(11) 
C7 0.0390(13) 0.0345(12) 0.0436(13) 0.0060(10) 0.0060(10) 0.0036(10) 
C8 0.0385(13) 0.0410(14) 0.0471(14) 0.0075(11) 0.0073(11) 0.0050(11) 
C9 0.0458(15) 0.0526(16) 0.0483(14) 0.0026(12) 0.0119(12) -0.0008(13) 
C10 0.0467(15) 0.0455(15) 0.0471(14) 0.0018(12) 0.0128(11) 0.0067(12) 
C11 0.0468(15) 0.0363(13) 0.0482(14) 0.0043(11) 0.0063(11) 0.0065(11) 
C12 0.0398(14) 0.0334(12) 0.0506(14) 0.0060(11) 0.0040(11) 0.0023(11) 
C13 0.0418(14) 0.0411(14) 0.0484(14) 0.0034(11) 0.0132(11) 0.0018(11) 
C14 0.0458(15) 0.0373(14) 0.0554(15) 0.0074(12) 0.0049(12) -0.0032(11) 
C15 0.0486(16) 0.0533(17) 0.0597(16) 0.0046(13) 0.0075(13) -0.0056(13) 
C16 0.0443(16) 0.070(2) 0.073(2) 0.0158(17) 0.0105(14) -0.0030(15) 
C17 0.0474(17) 0.070(2) 0.074(2) 0.0190(17) -0.0048(15) -0.0155(16) 
C18 0.0579(18) 0.0518(17) 0.0646(18) 0.0075(14) -0.0034(15) -0.0122(14) 
C19 0.0564(17) 0.0377(14) 0.0558(16) 0.0088(12) 0.0006(13) -0.0043(13) 
C20 0.0506(15) 0.0379(14) 0.0534(15) -0.0003(11) 0.0045(12) 0.0067(12) 
C21 0.078(2) 0.0580(18) 0.0498(16) -0.0041(14) 0.0001(14) 0.0073(16) 
C22 0.076(2) 0.0565(18) 0.0546(17) -0.0090(14) -0.0050(15) 0.0018(16) 
C23 0.077(2) 0.0460(16) 0.070(2) -0.0114(14) 0.0016(17) -0.0054(15) 
C24 0.072(2) 0.0550(19) 0.067(2) 0.0015(16) -0.0086(16) -0.0105(17) 
C25 0.088(3) 0.098(3) 0.068(2) -0.027(2) 0.0086(19) -0.007(2) 
  
_geom_special_details 
; 
 All esds (except the esd in the dihedral angle between two l.s. planes) 
 are estimated using the full covariance matrix.  The cell esds are taken 
 into account individually in the estimation of esds in distances, angles 
 and torsion angles; correlations between esds in cell parameters are only 
 used when they are defined by crystal symmetry.  An approximate (isotropic) 
 treatment of cell esds is used for estimating esds involving l.s. planes. 
; 
  
loop_ 
_geom_bond_atom_site_label_1 
_geom_bond_atom_site_label_2 
_geom_bond_distance 
_geom_bond_site_symmetry_2 
_geom_bond_publ_flag 
O1 C9 1.366(3) . ? 
O1 C1 1.387(3) . ? 
O2 C9 1.210(3) . ? 
O3 C21 1.431(3) . ? 
O3 C20 1.451(3) . ? 
N1 C3 1.383(4) . ? 
N1 C25 1.427(4) . ? 
N1 C24 1.446(4) . ? 
N2 C19 1.398(4) . ? 
N2 C20 1.429(4) . ? 
N2 C23 1.477(4) . ? 
C1 C2 1.374(4) . ? 
C1 C6 1.393(3) . ? 
C2 C3 1.402(4) . ? 
C2 H2A 0.9300 . ? 
C3 C4 1.414(4) . ? 
C4 C5 1.373(4) . ? 
C4 H4A 0.9300 . ? 
C5 C6 1.393(4) . ? 
C5 H5A 0.9300 . ? 
C6 C7 1.462(3) . ? 
C7 C13 1.402(3) . ? 
C7 C8 1.403(3) . ? 
C8 C10 1.390(4) . ? 
C8 C9 1.464(4) . ? 
C10 C11 1.387(4) . ? 
C10 H10A 0.9300 . ? 
C11 C12 1.418(4) . ? 
C11 C20 1.481(4) . ? 
C12 C13 1.395(3) . ? 
C12 C14 1.468(4) . ? 
C13 H13A 0.9300 . ? 
C14 C15 1.387(4) . ? 
C14 C19 1.428(4) . ? 
C15 C16 1.384(4) . ? 
C15 H15A 0.9300 . ? 
C16 C17 1.374(5) . ? 
C16 H16A 0.9300 . ? 
C17 C18 1.366(5) . ? 
C17 H17A 0.9300 . ? 
C18 C19 1.419(4) . ? 
C18 H18A 0.9300 . ? 
C20 H20A 0.9800 . ? 
C21 C22 1.507(5) . ? 
C21 H21A 0.9700 . ? 
C21 H21B 0.9700 . ? 
C22 C23 1.526(4) . ? 
C22 H22A 0.9700 . ? 
C22 H22B 0.9700 . ? 
C23 H23A 0.9700 . ? 
C23 H23B 0.9700 . ? 
C24 H24A 0.9600 . ? 
C24 H24B 0.9600 . ? 
C24 H24C 0.9600 . ? 
C25 H25A 0.9600 . ? 
C25 H25B 0.9600 . ? 
C25 H25C 0.9600 . ? 
  
loop_ 
_geom_angle_atom_site_label_1 
_geom_angle_atom_site_label_2 
_geom_angle_atom_site_label_3 
_geom_angle 
_geom_angle_site_symmetry_1 
_geom_angle_site_symmetry_3 
_geom_angle_publ_flag 
C9 O1 C1 122.1(2) . . ? 
C21 O3 C20 111.0(2) . . ? 
C3 N1 C25 122.1(3) . . ? 
C3 N1 C24 119.7(3) . . ? 
C25 N1 C24 118.1(3) . . ? 
C19 N2 C20 118.0(2) . . ? 
C19 N2 C23 119.9(2) . . ? 
C20 N2 C23 109.9(2) . . ? 
C2 C1 O1 114.6(2) . . ? 
C2 C1 C6 123.3(2) . . ? 
O1 C1 C6 122.1(2) . . ? 
C1 C2 C3 120.4(3) . . ? 
C1 C2 H2A 119.8 . . ? 
C3 C2 H2A 119.8 . . ? 
N1 C3 C2 121.1(3) . . ? 
N1 C3 C4 121.7(3) . . ? 
C2 C3 C4 117.2(2) . . ? 
C5 C4 C3 120.5(3) . . ? 
C5 C4 H4A 119.8 . . ? 
C3 C4 H4A 119.8 . . ? 
C4 C5 C6 123.0(3) . . ? 
C4 C5 H5A 118.5 . . ? 
C6 C5 H5A 118.5 . . ? 
C1 C6 C5 115.6(2) . . ? 
C1 C6 C7 118.5(2) . . ? 
C5 C6 C7 125.9(2) . . ? 
C13 C7 C8 117.8(2) . . ? 
C13 C7 C6 124.1(2) . . ? 
C8 C7 C6 118.0(2) . . ? 
C10 C8 C7 120.5(2) . . ? 
C10 C8 C9 118.1(2) . . ? 
C7 C8 C9 121.4(2) . . ? 
O2 C9 O1 117.0(2) . . ? 
O2 C9 C8 125.3(3) . . ? 
O1 C9 C8 117.7(2) . . ? 
C11 C10 C8 121.5(2) . . ? 
C11 C10 H10A 119.2 . . ? 
C8 C10 H10A 119.2 . . ? 
C10 C11 C12 119.0(2) . . ? 
C10 C11 C20 120.3(2) . . ? 
C12 C11 C20 120.6(2) . . ? 
C13 C12 C11 118.8(2) . . ? 
C13 C12 C14 123.4(2) . . ? 
C11 C12 C14 117.8(2) . . ? 
C12 C13 C7 122.3(2) . . ? 
C12 C13 H13A 118.9 . . ? 
C7 C13 H13A 118.9 . . ? 
C15 C14 C19 118.7(3) . . ? 
C15 C14 C12 122.4(2) . . ? 
C19 C14 C12 118.8(2) . . ? 
C16 C15 C14 122.7(3) . . ? 
C16 C15 H15A 118.6 . . ? 
C14 C15 H15A 118.6 . . ? 
C17 C16 C15 118.4(3) . . ? 
C17 C16 H16A 120.8 . . ? 
C15 C16 H16A 120.8 . . ? 
C18 C17 C16 121.4(3) . . ? 
C18 C17 H17A 119.3 . . ? 
C16 C17 H17A 119.3 . . ? 
C17 C18 C19 121.5(3) . . ? 
C17 C18 H18A 119.2 . . ? 
C19 C18 H18A 119.2 . . ? 
N2 C19 C18 122.7(3) . . ? 
N2 C19 C14 120.0(2) . . ? 
C18 C19 C14 117.2(3) . . ? 
N2 C20 O3 111.7(2) . . ? 
N2 C20 C11 113.8(2) . . ? 
O3 C20 C11 107.6(2) . . ? 
N2 C20 H20A 107.9 . . ? 
O3 C20 H20A 107.9 . . ? 
C11 C20 H20A 107.9 . . ? 
O3 C21 C22 111.4(3) . . ? 
O3 C21 H21A 109.3 . . ? 
C22 C21 H21A 109.3 . . ? 
O3 C21 H21B 109.3 . . ? 
C22 C21 H21B 109.3 . . ? 
H21A C21 H21B 108.0 . . ? 
C21 C22 C23 108.5(2) . . ? 
C21 C22 H22A 110.0 . . ? 
C23 C22 H22A 110.0 . . ? 
C21 C22 H22B 110.0 . . ? 
C23 C22 H22B 110.0 . . ? 
H22A C22 H22B 108.4 . . ? 
N2 C23 C22 109.8(2) . . ? 
N2 C23 H23A 109.7 . . ? 
C22 C23 H23A 109.7 . . ? 
N2 C23 H23B 109.7 . . ? 
C22 C23 H23B 109.7 . . ? 
H23A C23 H23B 108.2 . . ? 
N1 C24 H24A 109.5 . . ? 
N1 C24 H24B 109.5 . . ? 
H24A C24 H24B 109.5 . . ? 
N1 C24 H24C 109.5 . . ? 
H24A C24 H24C 109.5 . . ? 
H24B C24 H24C 109.5 . . ? 
N1 C25 H25A 109.5 . . ? 
N1 C25 H25B 109.5 . . ? 
H25A C25 H25B 109.5 . . ? 
N1 C25 H25C 109.5 . . ? 
H25A C25 H25C 109.5 . . ? 
H25B C25 H25C 109.5 . . ? 
  
_diffrn_measured_fraction_theta_max 0.993 
_diffrn_reflns_theta_full        26.01 
_diffrn_measured_fraction_theta_full 0.993 
_refine_diff_density_max         0.208 
_refine_diff_density_min         -0.218 
_refine_diff_density_rms         0.052 
  
loop_ 
_platon_squeeze_void_nr 
_platon_squeeze_void_average_x 
_platon_squeeze_void_average_y 
_platon_squeeze_void_average_z 
_platon_squeeze_void_volume 
_platon_squeeze_void_count_electrons 
_platon_squeeze_void_content 
1 0.500 0.000 1.000 141 41 ' ' 
2 0.500 0.500 0.500 141 41 ' ' 
_platon_squeeze_details 
; 
; 
  
